# Supplementary material for: Copper-64 labelling of triazacyclononane-triphosphinate chelators
Source: Royal Society of Chemistry journal article supplement (doi:10.1039/c2dt31880f), 2012-01-01
Supplement: c2dt31880f.pdf [file c2dt31880f.pdf]

## Supporting Information

### **Copper-64 labelling of triazacyclononane-triphosphate chelators**

Jakub Šimeček, Hans-Jürgen Wester and Johannes Notni

*Pharmazeutische Radiochemie, Technische Universität München, Walther-Meißner-Str. 3, D-85748  
Garching, Germany, email:johannes.notni@tum.de*

## 1. Materials and reagents

$^{64}\text{Cu}$  was obtained from ACOM (Montecosaro Scalo, Italy) in 0.1 M HCl. Content of non- $^{64}\text{Cu}$  metals according to the manufacturer:  $\text{Pb} \leq 0.129 \mu\text{g/mL}$ ,  $\text{Ni} \leq 0.394 \mu\text{g/mL}$ ,  $\text{Cu} \leq 0.165 \mu\text{g/mL}$ ,  $\text{Zn} \leq 0.338 \mu\text{g/mL}$ ,  $\text{Fe} \leq 0.465 \mu\text{g/mL}$ . NODAGA-RGD was purchased from ABX (Radeberg, Germany), NOTA<sup>[1]</sup>, DOTA<sup>[2]</sup>, TRAP-H<sup>[3]</sup>, TRAP-Pr<sup>[4]</sup>, NOPO<sup>[5]</sup>, TRAP(RGD)<sub>3</sub><sup>[6]</sup> and NOPO-RGD<sup>[5]</sup> were prepared as described in the literature. A sample of DEDPA was kindly provided by Carlos Platas Iglesias, Universidade da Coruña, Spain. Buffers (HEPES, sodium acetate) and water (Ultrapur) were purchased from Merck (Darmstadt, Germany).

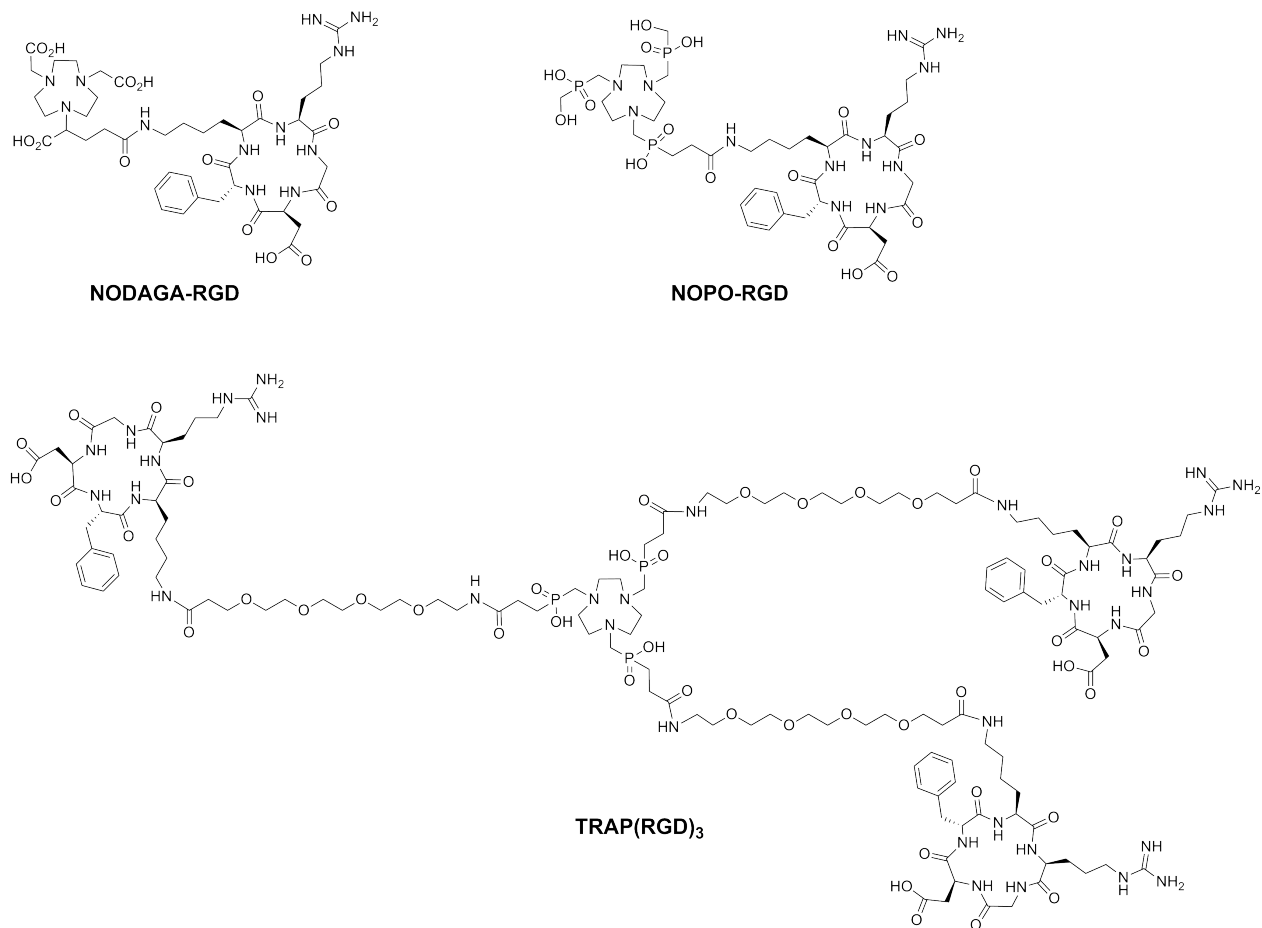

**Figure S1:** Structures of RGD peptide conjugates.

## 2. $^{64}\text{Cu}$ -labelling

*Non-buffered solutions:* For experiments at pH 3, 100  $\mu\text{L}$  of  $^{64}\text{Cu}$  in 0.1 M HCl was mixed with 9.9 mL of water. 90  $\mu\text{L}$  of that solution was mixed with 10  $\mu\text{L}$  of ligand solution, resulting in ligand concentrations of 0.1, 0.3, 1, 3 and 10  $\mu\text{M}$ . Activity of added  $^{64}\text{Cu}$  was in the range of 1.9–2.5 MBq (0.2–0.3 pmol). Labelling was done for 5 min at 25 °C, whereafter  $^{64}\text{Cu}$  incorporation was determined by radio-TLC (see below).

*Labelling in NaOAc buffer:* Mixing 10  $\mu\text{L}$  of 100  $\mu\text{M}$  solution (1 nmol of ligand in total) of TRAP(RGD)<sub>3</sub>, NOPO-RGD and NODAGA-RGD with 5  $\mu\text{L}$  of 1 M aq. NaOAc and addition of 7  $\mu\text{L}$  of <sup>64</sup>Cu in 0.1 M HCl (~ 3 MBq) resulted in pH 5.6. The mixtures were left standing for 5 min at 25 °C and then evaluated by radio-TLC (see below).

*Labelling in HEPES buffer:* TRAP(RGD)<sub>3</sub>, NOPO-RGD and NODAGA-RGD (10  $\mu\text{L}$  of 100  $\mu\text{M}$  solution, 1 nmol) were mixed with 80  $\mu\text{L}$  of aq. HEPES solution (7.2 g of HEPES + 6 mL water) and 10  $\mu\text{L}$  of <sup>64</sup>Cu (~ 4 MBq) in 0.1 M HCl was added, which resulted in pH 5.7. The mixtures were incubated for 5 min at 37 °C and evaluated by radio-TLC (see below).

*Preparation of the tracer for in vivo injection:* TRAP(RGD)<sub>3</sub> (5 nmol) in water (50  $\mu\text{L}$ ) was mixed with 5  $\mu\text{L}$  of aq. HEPES solution and 0.1 M NaOH (40  $\mu\text{L}$ ). <sup>64</sup>Cu in 0.1 M HCl (50  $\mu\text{L}$ , 120 MBq, 13.2 pmol) was added (final pH ~ 4.4) and the solution was heated for 30 min to 95 °C. <sup>64</sup>Cu-labelled tracer was purified by solid phase extraction, using a C8 light cartridge (Waters), preconditioned with 10 mL of ethanol and 10 mL of water. The reaction mixture was passed over the cartridge, purged with 1 mL of water in order to remove free <sup>64</sup>Cu, and the product eluted with 1 mL of ethanol. After addition of water (1 mL) and PBS (1 mL), the ethanol was evaporated in vacuo and the solution simultaneously concentrated to 1 mL. Before injection, the formulation was filtered over a 0.22  $\mu\text{m}$  sterile filter.

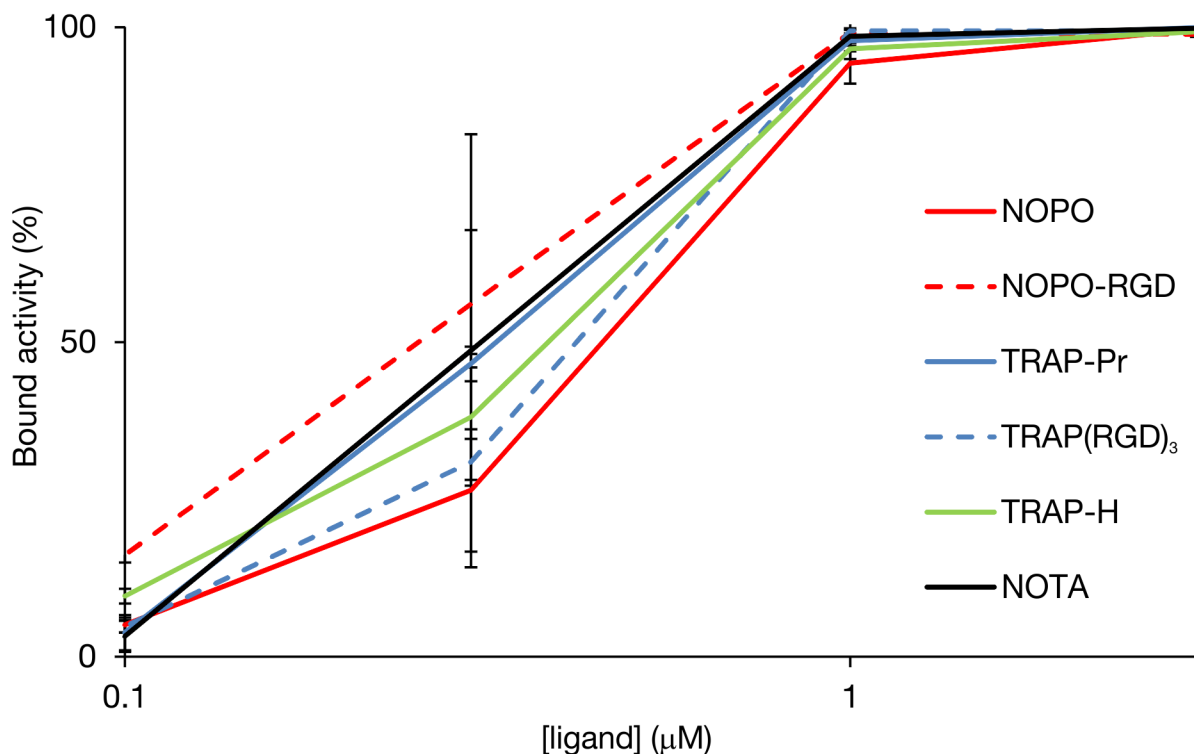

**Figure S2:** <sup>64</sup>Cu incorporation as function of chelator concentration.

## 2.1. Comment on metal-to-ligand ratio and incorporation efficiency

Even though the labelling with low activity of  $^{64}\text{Cu}$  showed to be highly efficient using low chelator amount, e.g. 0.1–1 nmol (Figure 1), the labelling efficiency showed to be highly dependent on the metal-to-ligand (M:L) ratio. Labelling with higher activity of  $^{64}\text{Cu}$  and similar ligand concentration did not lead to comparable activity incorporation. Therefore, for preparation of higher doses, e.g. for injection purposes, the strategy similar to that for routine labelling with  $^{177}\text{Lu}$  is of choice, i.e., calculation of a well-defined, known optimal excess of chelator. On the contrary, when labelling of e.g. 1 nmol of TRAP chelators with  $^{68}\text{Ga}$ , quantitative activity incorporation independent on the absolute activity is observed.

For example, labelling of 0.1 nmol ( $c = 1 \mu\text{M}$ ) of precursors with  $\sim 2.2 \text{ MBq}$  of  $^{64}\text{Cu}$  ( $\sim 0.24 \text{ pmol}$ , M:L ratio 1:417) resulted in quantitative  $^{64}\text{Cu}$  incorporation at r.t. Contrary, labelling of a ten times higher concentration of TRAP(RGD)<sub>3</sub> ( $c = 10 \mu\text{M}$ , 1 nmol) with  $^{64}\text{Cu}$  (120 MBq, 13.2 pmol, pH 3.1 adjusted with aq. HEPES) resulted in a M:L ratio of 1:75, which was too low to yield labelled product, even at 95 °C. However, a radiochemical yield of > 95 % was reached by labelling 5 nmol of the precursor (M:L ratio is then 1:378). In further experiments, adjusting the pH to 4.4 helped to reduce the reaction time to 20 min at 95 °C. Specific activities were typically ranging around 20 GBq/ $\mu\text{mol}$ .

## 3. Analysis

$^{64}\text{Cu}$  incorporation by chelators was evaluated by TLC (silica 60 coated alumina sheets, Merck), using 0.1 M aq. EDTA as mobile phase. Labelled chelators/conjugates stay at the origin ( $R_f = 0$ ), whereas unbound  $^{64}\text{Cu}$  is complexed by EDTA and moves with the front ( $R_f = 0.9\text{--}1.0$ ).

## 4. EDTA challenge and stability in human plasma

The chelators (1–2 nmol of each) were labelled with  $\sim 12 \text{ MBq}$  of  $^{64}\text{Cu}$ , using a mixture of  $^{64}\text{Cu}$  in 0.1 M HCl (7  $\mu\text{L}$ ) and 1 M NaOAc (5  $\mu\text{L}$ ), pH 5.7, 5 min reaction at 95 °C. Full labelling was confirmed by TLC. Then, each sample was diluted with PBS to reach a volume of 50  $\mu\text{L}$ . 20  $\mu\text{L}$  of the solutions were added to 100  $\mu\text{L}$  of 0.1 M EDTA and left standing at room temperature. Samples for TLC analysis were withdrawn after 1, 2 and 12 h.

The stability of  $^{64}\text{Cu}$ -labelled NOPO-RGD, TRAP(RGD)<sub>3</sub> and NODAGA-RGD was tested also in human plasma, for which purpose 20  $\mu\text{L}$  of the solutions containing labelled conjugate (prepared as described before) were transferred to 100  $\mu\text{L}$  of plasma, and incubated at room temperature. Samples for TLC analysis were taken after 1, 2 and 12 h of incubation.

## 5. log*P* determination

50  $\mu\text{L}$  ( $\sim 0.5 \text{ MBq}$ ) of PBS solution of a purified tracer was mixed with 450  $\mu\text{L}$  of PBS and 500  $\mu\text{L}$  of n-octanol. After 1 min of vigorous shaking, the phases were separated by centrifugation and the activity contained in 100  $\mu\text{L}$  aliquots of both water and n-octanol phases were measured in a  $\gamma$ -counter (1480 WIZARD<sup>TM</sup>, PerkinElmer Wallac). Experiments were repeated 8 times.

## 6. Small animal PET imaging

The animal model for  $\alpha_v\beta_3$  integrin expression was described before in detail.<sup>[6]</sup> Briefly, CD-1 athymic nude mice were used, bearing tumor xenografts (M21 human melanoma with high  $\alpha_v\beta_3$  integrin expression) on the right shoulder.

MicroPET imaging was performed using small animal PET/CT scanner (Siemens Inveon).  $^{68}\text{Ga}$ -TRAP(RGD)<sub>3</sub> (12 MBq, prepared as described<sup>[6]</sup>) or  $^{64}\text{Cu}$ -TRAP(RGD)<sub>3</sub> in PBS (30 MBq) was injected to the tail vein of a mouse anaesthetised with isoflurane. PET data was recorded for 15 min, 75 min p.i. ( $^{68}\text{Ga}$ - and  $^{64}\text{Cu}$ -TRAP(RGD)<sub>3</sub>) and 18 h p.i. ( $^{64}\text{Cu}$ -TRAP(RGD)<sub>3</sub> only). Images were reconstructed using Inveon Research Workplace software; 3D ordered-subsets expectation maximum (OSEM3D) algorithm without scanner and attenuation correction. All animal experiments were performed in accordance with general animal welfare regulations in Germany.

## References

- <sup>1</sup> S. Grös, H. Elias, *Inorg. Chim. Acta* **1996**, *251*, 347–354.
- <sup>2</sup> J. F. Desreux, *Inorg. Chem.* **1980**, *19*, 1319–1324.
- <sup>3</sup> J. Šimeček, M. Schulz, J. Notni, J. Plutnar, V. Kubíček, J. Havlíčková, P. Hermann, *Inorg. Chem.* **2012**, *51*, 577–590.
- <sup>4</sup> J. Notni, P. Hermann, J. Havlíčková, J. Kotek, V. Kubíček, J. Plutnar, N. Loktionova, P. J. Riss, F. Rösch, I. Lukeš, *Chem. Eur. J.* **2010**, *16*, 7174–7185.
- <sup>5</sup> J. Šimeček, O. Zemek, P. Hermann, H.-J. Wester, J. Notni, *ChemMedChem* **2012**, *7*, 1375–1378.
- <sup>6</sup> J. Notni, J. Šimeček, P. Hermann, H. J. Wester, *Chem. Eur. J.* **2011**, *17*, 14718–14722.
